# Supplementary material for: T cell receptor binding affinity governs the functional profile of cancer-specific CD8+ T cells
Source: PubMed Central journal article supplement — Clin Exp Immunol. 2015 Apr 14;180(2):255–70. doi: 10.1111/cei.12570 (PMC4408161; doi:10.1111/cei.12570), 2015-04-14
Supplement: cei0180-0255-sd1.pdf [file cei0180-0255-sd1.pdf]

### Supplementary Figure 1

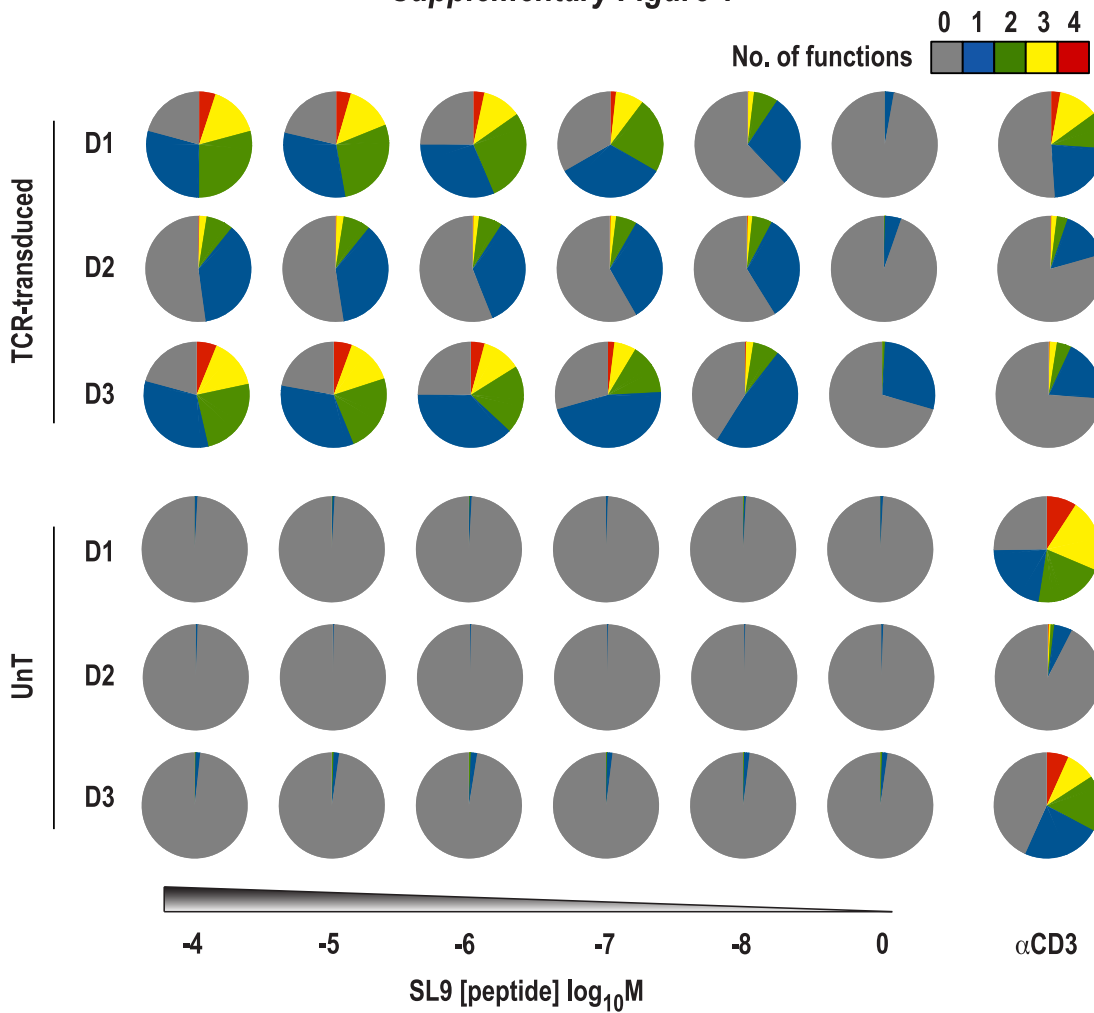

**Supplementary Figure 1. The impact of donor origin on the functional profile of TCR-transduced CD8<sup>+</sup> T cells.** (A) Peripheral blood CD8<sup>+</sup> T cells were isolated from three different HLA-A2<sup>+</sup> donors (D1, D2 and D3), transduced with a wild-type TCR specific for the HLA-A2-restricted HIV-1 Gag<sub>77-85</sub> epitope and stimulated with peptide-pulsed HLA-A2<sup>+</sup> C1R target cells as indicated. Stimulation with an αCD3 mAb was used for positive control purposes. Four functional read-outs (MIP-1β, TNFα, IFNγ and IL-2) were measured by flow cytometry. Pie chart segments represent the fraction of cells expressing the number of functions indicated in the key. UnT, non-transduced.

## Supplementary Figure 2

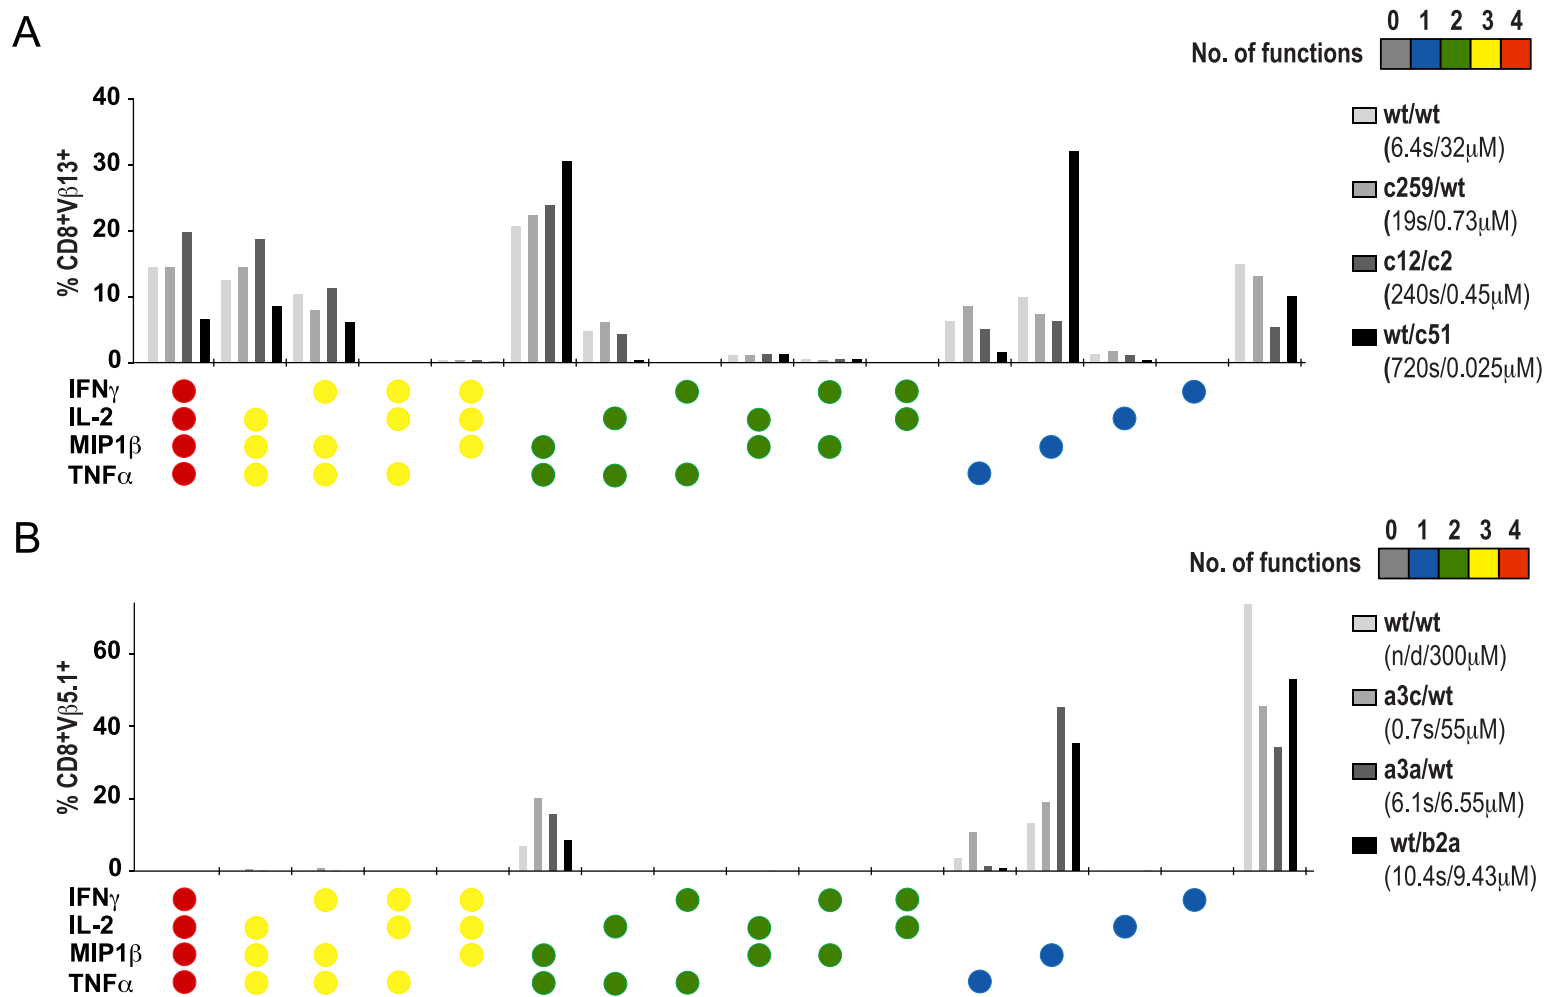

**Supplementary Figure 2. Combinations of functions elicited by stimulation of TCR-transduced CD8<sup>+</sup> T cells with peptide-pulsed target cells.** (A) HLA-A2<sup>+</sup> CD8<sup>+</sup> T cells transduced with the indicated NY-ESO-1-specific TCRs were stimulated with HLA-A2<sup>+</sup> CIR target cells pulsed with the cognate SLLMWITQC peptide at a concentration of 10<sup>-5</sup> M. (B) HLA-A1<sup>+</sup> CD8<sup>+</sup> T cells transduced with the indicated MageA3-specific TCRs were stimulated with HLA-A1<sup>+</sup> 221 target cells pulsed with the cognate EVDPIGHLY peptide at a concentration of 10<sup>-4</sup> M. Four functional readouts (MIP-1 $\beta$ , TNF $\alpha$ , IFN $\gamma$  and IL-2) were measured by flow cytometry. Data shown are representative of two independent experiments. n/d, not determined.
